# Supplementary material for: Sex-specific association of plasma vitamin E with homocysteine levels in Chinese middle-aged and older men and women: evidence from four large population based studies
Source: Research Square preprint supplement (doi:10.21203/rs.3.rs-8483180/v1), 2026-01-21
Supplement: Supplementary file 1 [file e36fdf676f9770680c54c304.docx]

**Supplementary file**

**Table S1.** Age-specific and sex-specific association between plasma vitamin E and homocysteine level

**Table S2.** Age-specific and sex-specific association between plasma vitamin E and hyperhomocysteinemia

**Figure S1.** Flowchart of this study

**Figure S2.** Subgroup analyses for association between plasma vitamin E and hyperhomocysteinemia

**Table S1. Age-specific and sex-specific association between plasma vitamin E and homocysteine level**

|  | N | **Crude model** | | **Adjusted model** | |
| --- | --- | --- | --- | --- | --- |
|  | beta(95%CI) a | *p* | beta(95%CI) a | *p* |
| **Male** |  |  |  |  |  |
| **< 65 year-old** |  |  |  |  |  |
| Per 1 SD | 3468 | -0.01(-0.17,0.15) | 0.886 | 0.03(-0.14,0.20) | 0.723 |
| Q1 (<7.8 ug/ml) | 692 | 1.07(0.57,1.57) | <0.001 | 0.78(0.29,1.26) | 0.002 |
| Q2 (7.8~9.2 ug/ml) | 695 | 0.21(-0.29,0.71) | 0.414 | 0.23(-0.26,0.71) | 0.360 |
| Q3 (9.2~10.5 ug/ml) | 694 | **Ref.** |  | **Ref.** |  |
| Q4 (10.5~12.3 ug/ml) | 676 | 0.19(-0.32,0.69) | 0.463 | 0.22(-0.27,0.70) | 0.377 |
| Q5 (≥12.3 ug/ml) | 711 | 0.67(0.17,1.17) | 0.009 | 0.51(0.01,1.00) | 0.047 |
| *P* for trendb |  |  | 0.407 |  | 0.364 |
| **≥ 65 year-old** |  |  |  |  |  |
| Per 1 SD | 3671 | -0.32(-0.50,-0.15) | <0.001 | -0.15(-0.33,0.02) | 0.088 |
| Q1 (<7.6 ug/ml) | 731 | 1.44(0.97,1.92) | <0.001 | 0.82(0.37,1.27) | <0.001 |
| Q2 (7.6~8.8 ug/ml) | 737 | 0.32(-0.16,0.79) | 0.189 | 0.21(-0.24,0.65) | 0.367 |
| Q3 (8.8~9.9 ug/ml) | 731 | **Ref.** |  | **Ref.** |  |
| Q4 (9.9~11.5 ug/ml) | 708 | 0.15(-0.33,0.62) | 0.548 | 0.07(-0.38,0.52) | 0.751 |
| Q5 (≥11.5 ug/ml) | 764 | 0.27(-0.20,0.74) | 0.256 | 0.24(-0.21,0.70) | 0.296 |
| *P* for trendb |  |  | 0.164 |  | 0.752 |
|  |  |  |  |  |  |
| **Female** |  |  |  |  |  |
| **< 65 year-old** |  |  |  |  |  |
| Per 1 SD | 4818 | 0.09(-0.01,0.19) | 0.076 | -0.02(-0.12,0.08) | 0.713 |
| Q1 (<8.6 ug/ml) | 960 | 0.27(-0.05,0.60) | 0.099 | 0.06(-0.25,0.37) | 0.695 |
| Q2 (8.6~10.1 ug/ml) | 958 | 0.01(-0.31,0.33) | 0.946 | 0.16(-0.15,0.46) | 0.320 |
| Q3 (10.1~11.3 ug/ml) | 932 | **Ref.** |  | **Ref.** |  |
| Q4 (11.3~13.1 ug/ml) | 993 | 0.29(-0.03,0.62) | 0.072 | 0.15(-0.15,0.46) | 0.324 |
| Q5 (≥13.1 ug/ml) | 975 | 0.51(0.19,0.84) | 0.002 | 0.10(-0.22,0.42) | 0.529 |
| *P* for trendb |  |  | 0.004 |  | 0.391 |
| **≥ 65 year-old** |  |  |  |  |  |
| Per 1 SD | 3885 | -0.14(-0.26,-0.02) | 0.025 | -0.08(-0.21,0.04) | 0.200 |
| Q1 (<8.8 ug/ml) | 777 | 0.41(0.04,0.79) | 0.032 | 0.14(-0.23,0.51) | 0.454 |
| Q2 (8.8~10.2 ug/ml) | 751 | 0.08(-0.30,0.46) | 0.689 | 0.03(-0.33,0.40) | 0.862 |
| Q3 (10.2~11.5 ug/ml) | 803 | **Ref.** |  | **Ref.** |  |
| Q4 (11.5~13.3 ug/ml) | 762 | 0.09(-0.28,0.47) | 0.624 | 0.15(-0.21,0.52) | 0.405 |
| Q5 (≥13.3 ug/ml) | 792 | -0.03(-0.41,0.34) | 0.871 | -0.05(-0.42,0.32) | 0.801 |
| *P* for trendb |  |  | 0.388 |  | 0.902 |

aBeta coefficients were estimated using a general linear model.

bPerformed by treating vitamin E quartiles as a numeric variable.

Crude model: unadjusted.

Adjusted model: adjusted for sex, age, education, occupation, marital status, smoking status, alcohol consumption, body mass index, hypertension, diabetes, hyperlipidemia, stroke, coronary heart disease, chronic kidney disease, folate, VB12

**Table S2. Age-specific and sex-specific association between plasma vitamin E and hyperhomocysteinemia**

|  | Events(%) | **Crude model** | | **Adjusted model** | |
| --- | --- | --- | --- | --- | --- |
|  | OR(95%CI) a | *p* | OR(95%CI) a | *p* |
| **Male** |  |  |  |  |  |
| **< 65 year-old** |  |  |  |  |  |
| Per 1 SD | 896(25.8) | 0.96(0.89,1.04) | 0.336 | 1.00(0.92,1.09) | 0.970 |
| Q1 (<7.8 ug/ml) | 228(32.9) | 1.67(1.31,2.11) | <0.001 | 1.46(1.14,1.88) | 0.003 |
| Q2 (7.8~9.2 ug/ml) | 168(24.2) | 1.67(1.31,2.11) | <0.001 | 1.05(0.81,1.36) | 0.724 |
| Q3 (9.2~10.5 ug/ml) | 158(22.8) | **Ref.** |  | **Ref.** |  |
| Q4 (10.5~12.3 ug/ml) | 152(22.5) | 0.98(0.76,1.27) | 0.901 | 0.99(0.76,1.29) | 0.950 |
| Q5 (≥12.3 ug/ml) | 190(26.7) | 1.24(0.97,1.58) | 0.086 | 1.19(0.91,1.55) | 0.195 |
| *P* for trendb |  |  | 0.649 |  | 0.925 |
| **≥ 65 year-old** |  |  |  |  |  |
| Per 1 SD | 1299(35.4) | 0.88(0.81,0.96) | 0.002 | 0.94(0.86,1.03) | 0.173 |
| Q1 (<7.6 ug/ml) | 331(45.3) | 1.75(1.41,2.16) | <0.001 | 1.42(1.13,1.78) | 0.003 |
| Q2 (7.6~8.8 ug/ml) | 245(33.2) | 1.05(0.85,1.31) | 0.655 | 1.00(0.80,1.26) | 0.977 |
| Q3 (8.8~9.9 ug/ml) | 235(32.1) | **Ref.** |  | **Ref.** |  |
| Q4 (9.9~11.5 ug/ml) | 237(33.5) | 1.06(0.85,1.32) | 0.592 | 1.04(0.83,1.31) | 0.735 |
| Q5 (≥11.5 ug/ml) | 251(32.9) | 1.03(0.83,1.28) | 0.771 | 1.01(0.80,1.27) | 0.950 |
| *P* for trendb |  |  | 0.061 |  | 0.300 |
|  |  |  |  |  |  |
| **Female** |  |  |  |  |  |
| **< 65 year-old** |  |  |  |  |  |
| Per 1 SD | 493(10.2) | 0.93(0.84,1.02) | 0.117 | 0.93(0.84,1.03) | 0.155 |
| Q1 (<8.6 ug/ml) | 113(11.8) | 1.38(1.02,1.87) | 0.034 | 1.19(0.87,1.62) | 0.284 |
| Q2 (8.6~10.1 ug/ml) | 101(10.5) | 1.22(0.90,1.66) | 0.200 | 1.31(0.95,1.81) | 0.094 |
| Q3 (10.1~11.3 ug/ml) | 82(8.8) | **Ref.** |  | **Ref.** |  |
| Q4 (11.3~13.1 ug/ml) | 96(9.7) | 1.11(0.81,1.51) | 0.511 | 1.13(0.82,1.56) | 0.466 |
| Q5 (≥13.1 ug/ml) | 101(10.4) | 1.20(0.88,1.63) | 0.251 | 1.09(0.79,1.52) | 0.594 |
| *P* for trendb |  |  | 0.771 |  | 0.707 |
| **≥ 65 year-old** |  |  |  |  |  |
| Per 1 SD | 801(20.6) | 0.86(0.80,0.94) | <0.001 | 0.90(0.82,0.98) | 0.018 |
| Q1 (<8.8 ug/ml) | 193(24.8) | 1.39(1.10,1.77) | 0.007 | 1.19(0.92,1.54) | 0.175 |
| Q2 (8.8~10.2 ug/ml) | 158(21.0) | 1.12(0.88,1.44) | 0.360 | 1.09(0.84,1.41) | 0.522 |
| Q3 (10.2~11.5 ug/ml) | 154(19.2) | **Ref.** |  | **Ref.** |  |
| Q4 (11.5~13.3 ug/ml) | 149(19.6) | 1.02(0.80,1.32) | 0.851 | 1.06(0.81,1.37) | 0.674 |
| Q5 (≥13.3 ug/ml) | 147(18.6) | 0.96(0.75,1.23) | 0.753 | 0.95(0.73,1.24) | 0.698 |
| *P* for trendb |  |  | 0.162 |  | 0.533 |

aORs were estimated using a logistic regression model.

bPerformed by treating vitamin E quartiles as a numeric variable.

Crude model: unadjusted.

Adjusted model: adjusted for sex, age, education, occupation, marital status, smoking status, alcohol consumption, body mass index, hypertension, diabetes, hyperlipidemia, stroke, coronary heart disease, chronic kidney disease, folate, VB12

**Figure S1.** Flowchart of this study


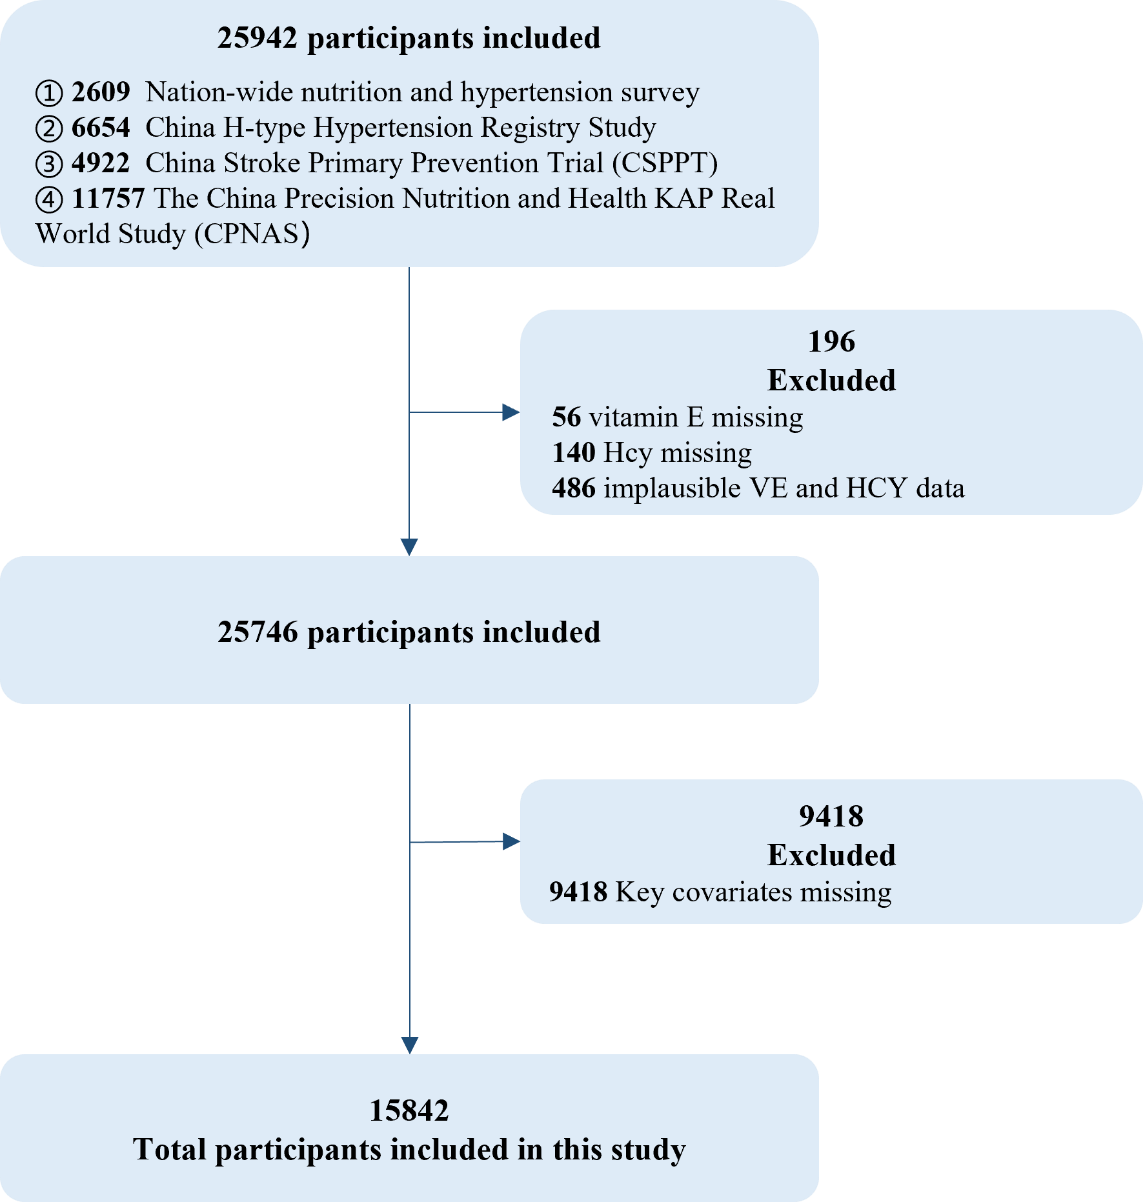


**Figure S2.** Subgroup analyses for association between plasma vitamin E and hyperhomocysteinemia


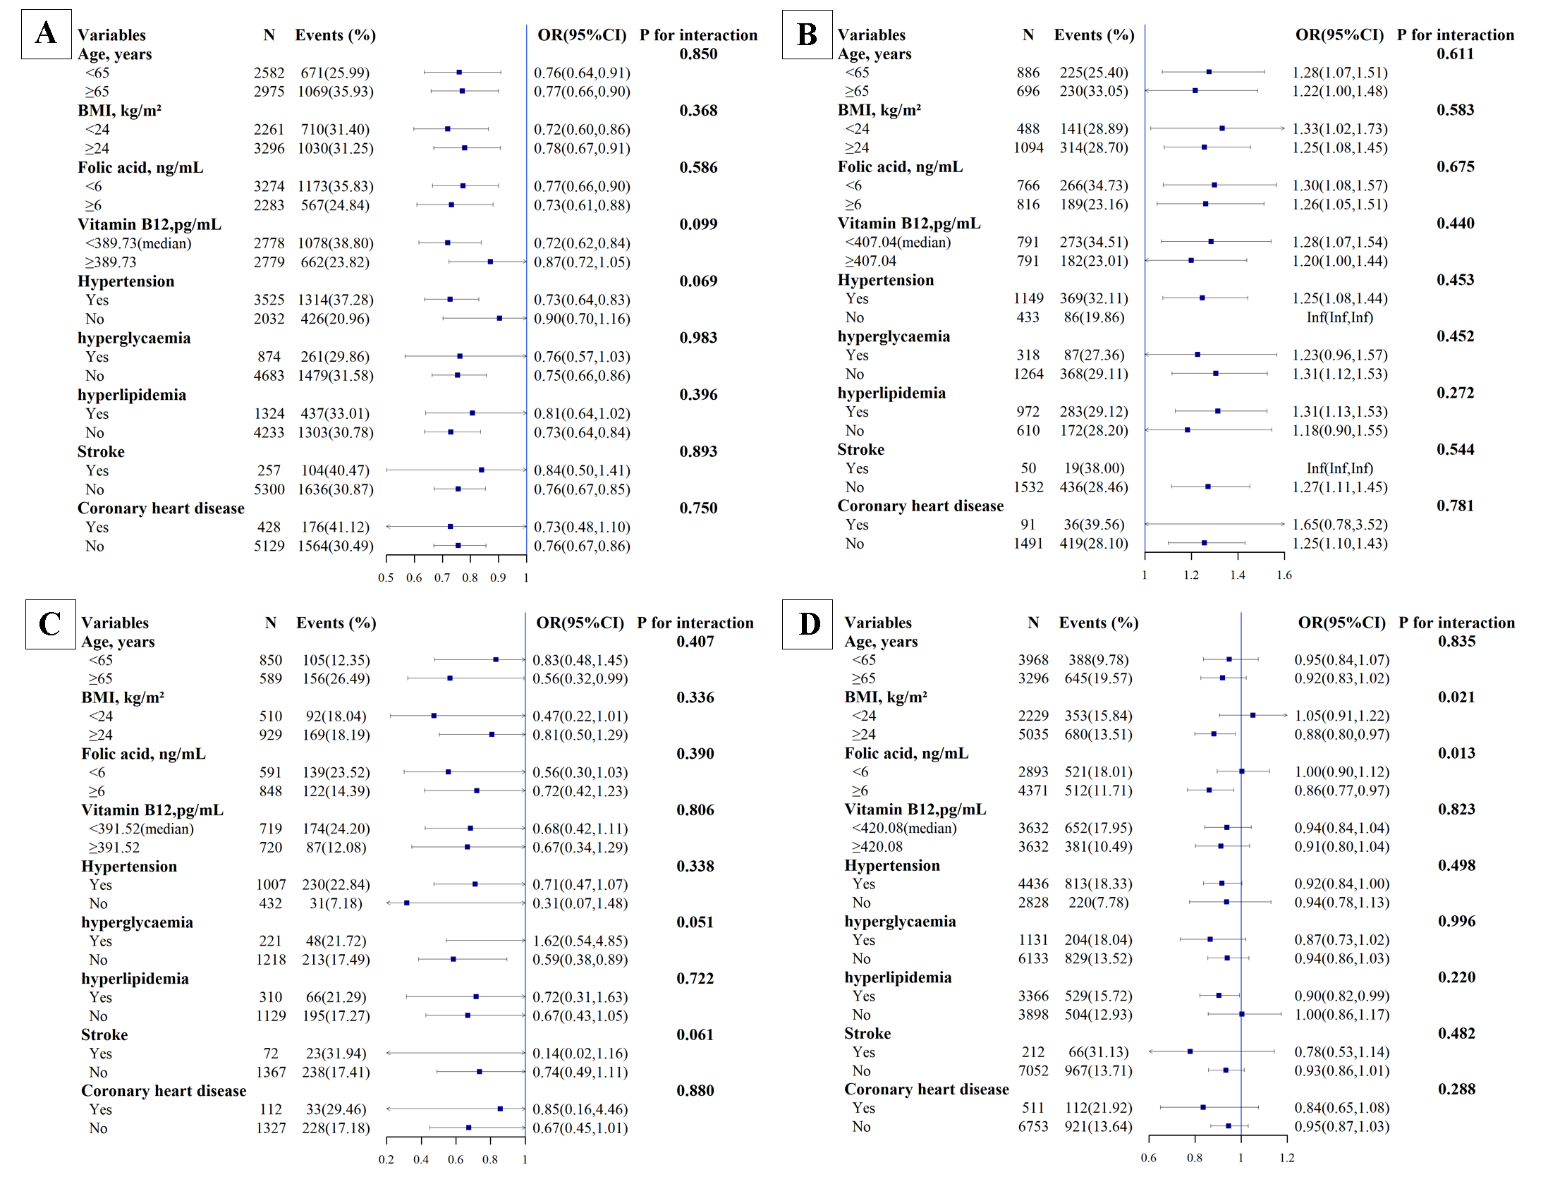


A&B: Stratified analysis for plasma vitamin E and hyperhomocysteinemia in various subgroups in men divided by 11.67 ug/ml.(A: plasma vitamin E< 11.67 ug/ml; B: plasma vitamin E≥ 11.67 ug/ml)

C&D: Stratified analysis for plasma vitamin E and hyperhomocysteinemia in various subgroups in women divided by 8.38 ug/ml.(A: plasma vitamin E< 8.38 ug/ml; B: plasma vitamin E≥ 8.38 ug/ml)
